# Supplementary material for: Enhancing physical health support for people living with severe mental ill-health: Understanding the implementation landscape
Source: Research Square preprint supplement (doi:10.21203/rs.3.rs-6829555/v1), 2025-07-31
Supplement: Supplementary file 1 [file d805ec69d75dd40da965adf8.docx]

| **No.** | **Topic** | **Page number item** |
| --- | --- | --- |
| **Title and abstract** | | |
| S1 | Title | 1 |
| S2 | Abstract | 2-3 |
| Introduction | | |
| S3 | Problem formulation | 6-7 |
| S4 | Purpose or research question | 8-9 |
| **Methods** | | |
| S5 | Qualitative approach and research paradigm | 12-15 |
| S6 | Researcher characteristics and reflexivity | 9 |
| S7 | Context | 13 |
| S8 | Sampling strategy | 10, 11 |
| S9 | Ethical issues pertaining to human subjects | 15 |
| S10 | Data collection methods | 11-12 |
| S11 | Data collection instruments and technologies | 12 |
| S12 | Units of study | 10-11 |
| S13 | Data processing | 12 |
| S14 | Data analysis | 12-15 |
| S15 | Techniques to enhance trustworthiness | 13-14 |
| **Results/findings** | | |
| S16 | Synthesis and interpretation | 15-20, 36 |
| S17 | Links to empirical data | 21-35 |
| **Discussion** | | |
| S18 | Integration with prior work, implications, transferability, and contribution(s) to the field |  |
| S19 | Limitations |  |
| **Other** | | |
| S20 | Conflict of interest |  |
| S21 | Funding |  |

Additional file1. Standards for Reporting Qualitative Research (SRQR)

Table 1: Index of Standards for Reporting Qualitative Research

<https://www.equator-network.org/reporting-guidelines/srqr>
